# Supplementary material for: Diversity and Molecular Evolution of Antimicrobial Peptides in Caecilian Amphibians
Source: MDPI journal article supplement (doi:10.3390/toxins16030150), 2024-03-14
Supplement: s1 [file s1]

|         |                |            |   |   |   |   |   |   |   |   |   |   |   |
|---------|----------------|------------|---|---|---|---|---|---|---|---|---|---|---|
| G1PML8* | Kininogen      | Mammalia   | X |   | X | X | X | X | X |   | X | X | X |
| AP01646 | LEAP2          | Fish       | X | X | X | X |   |   |   |   | X |   |   |
| AP03119 | LEAP2          | Fish       |   | X |   | X |   |   |   |   |   |   |   |
| AP03568 | LEAP2          | Fish       |   |   |   |   |   | X |   |   |   |   | X |
| AP02257 | Lysozyme C     | Mammalia   | X |   | X | X | X | X | X | X |   | X |   |
| AP02766 | Lysozyme C     | Mamma      | X |   | X | X |   | X | X |   | X | X |   |
| AP03456 | Lysozyme C     | Sauropsida | X |   | X | X | X | X | X | X | X | X |   |
| AP02743 | Lysozyme G     | Fish       | X |   | X | X | X | X | X |   | X | X | X |
| AP03464 | Neuropeptide W | Mammalia   | X |   |   | X |   |   | X |   | X |   | X |
| AP00400 | Neuropetide YY | Amphibia   | X | X | X | X |   | X | X |   | X | X | X |
| AP03279 | PACAP          | Fish       | X |   | X | X | X | X | X |   | X | X | X |
| AP03465 | POMC           | Mammalia   | X |   | X | X |   |   |   |   | X | X | X |
| AP00812 | Proenkephalin  | Mammalia   | X |   |   | X |   | X | X |   | X | X |   |
| AP02896 | Thymosin       | Fish       | X |   | X | X |   |   |   |   | X | X | X |
| AP02353 | Vasostatin     | Mammalia   | X | X | X | X | X | X | X |   | X |   | X |

<sup>G</sup> species with genome data only

<sup>G+T</sup> species with genomic and transcriptomic data

<sup>T</sup> species with transcriptomic data only

\* Blast matches against UniProt records (all other without asterisk are matches against APD3 records)
