# Supplementary material for: Diversity and Molecular Evolution of Antimicrobial Peptides in Caecilian Amphibians
Source: MDPI journal article supplement (doi:10.3390/toxins16030150), 2024-03-14
Supplement: s1 [file s1]

**Table S2.** Reliability of AI-based activity prediction methods used to measure the antimicrobial properties of a dataset of 1000 randomly generated peptides. The percentage of positive hits among the randomly generated data (identifying a sequence as AMP when it is not) is shown for each of the tools.

| Server                                               | DBAASP | Antimicrobial Peptide Scanner |       | CAMPR4 |     |     |
|------------------------------------------------------|--------|-------------------------------|-------|--------|-----|-----|
| Method                                               | DBAASP | RF                            | Earth | RF     | SVM | ANN |
| % of positive hits among the randomly generated data | 6.72   | 6.6                           | 14.4  | 18.4   | 8.2 | 7.2 |
